# Supplementary material for: World Input-Output Network
Source: PLOS journal article supplement (doi:10.1371/journal.pone.0134025), 2015-07-29
Supplement: S3 (10.1371/journal.pone.0134025.s003) [file journal.pone.0134025.s003]

| Full Name                                                                           | ISIC Rev. 3 Code | WIOD Code | 3-Letter Code |
|-------------------------------------------------------------------------------------|------------------|-----------|---------------|
| Agriculture, Hunting, Forestry and Fishing                                          | AtB              | c1        | Agr           |
| Mining and Quarrying                                                                | C                | c2        | Min           |
| Food, Beverages and Tobacco                                                         | 15t16            | c3        | Fod           |
| Textiles and Textile Products                                                       | 17t18            | c4        | Tex           |
| Leather, Leather and Footwear                                                       | 19               | c5        | Lth           |
| Wood and Products of Wood and Cork                                                  | 20               | c6        | Wod           |
| Pulp, Paper, Paper , Printing and Publishing                                        | 21t22            | c7        | Pup           |
| Coke, Refined Petroleum and Nuclear Fuel                                            | 23               | c8        | Cok           |
| Chemicals and Chemical Products                                                     | 24               | c9        | Chm           |
| Rubber and Plastics                                                                 | 25               | c10       | Rub           |
| Other Non-Metallic Mineral                                                          | 26               | c11       | Omn           |
| Basic Metals and Fabricated Metal                                                   | 27t28            | c12       | Met           |
| Machinery, Nec                                                                      | 29               | c13       | Mch           |
| Electrical and Optical Equipment                                                    | 30t33            | c14       | Elc           |
| Transport Equipment                                                                 | 34t35            | c15       | Tpt           |
| Manufacturing, Nec; Recycling                                                       | 36t37            | c16       | Mnf           |
| Electricity, Gas and Water Supply                                                   | E                | c17       | Ele           |
| Construction                                                                        | F                | c18       | Cst           |
| Sale, Maintenance and Repair of Motor Vehicles and Motorcycles; Retail Sale of Fuel | 50               | c19       | Sal           |
| Wholesale Trade and Commission Trade, Except of Motor Vehicles and Motorcycles      | 51               | c20       | Whl           |
| Retail Trade, Except of Motor Vehicles and Motorcycles; Repair of Household Goods   | 52               | c21       | Rtl           |
| Hotels and Restaurants                                                              | H                | c22       | Htl           |
| Inland Transport                                                                    | 60               | c23       | Ldt           |
| Water Transport                                                                     | 61               | c24       | Wtt           |
| Air Transport                                                                       | 62               | c25       | Ait           |
| Other Supporting and Auxiliary Transport Activities; Activities of Travel Agencies  | 63               | c26       | Otr           |
| Post and Telecommunications                                                         | 64               | c27       | Pst           |
| Financial Intermediation                                                            | J                | c28       | Fin           |
| Real Estate Activities                                                              | 70               | c29       | Est           |
| Renting of M&Eq and Other Business Activities                                       | 71t74            | c30       | Obs           |
| Public Admin and Defence; Compulsory Social Security                                | L                | c31       | Pub           |
| Education                                                                           | M                | c32       | Edu           |
| Health and Social Work                                                              | N                | c33       | Hth           |
| Other Community, Social and Personal Services                                       | O                | c34       | Ocm           |
| Private Households with Employed Persons                                            | P                | c35       | Pvt           |
